# Supplementary material for: Health-Screening-Based Chronic Obstructive Pulmonary Disease and Its Effect on Cardiovascular Disease Risk
Source: MDPI journal article supplement (doi:10.3390/jcm11113181), 2022-06-02
Supplement: s1 [file jcm-1726848-supplementary.pdf › jcm-1726848-supplementary.pdf]

**Supplementary Table S1. TRIPOD Checklist: Prediction Model Development and Validation**

| Section/Topic                |     | Checklist Item |                                                                                                                                                                                                       | Page |
|------------------------------|-----|----------------|-------------------------------------------------------------------------------------------------------------------------------------------------------------------------------------------------------|------|
| Title and abstract           |     |                |                                                                                                                                                                                                       |      |
| Title                        | 1   | D;V            | Identify the study as developing and/or validating a multivariable prediction model, the target population, and the outcome to be predicted.                                                          | 1    |
| Abstract                     | 2   | D;V            | Provide a summary of objectives, study design, setting, participants, sample size, predictors, outcome, statistical analysis, results, and conclusions.                                               | 1    |
| Introduction                 |     |                |                                                                                                                                                                                                       |      |
| Background and objectives    | 3a  | D;V            | Explain the medical context (including whether diagnostic or prognostic) and rationale for developing or validating the multivariable prediction model, including references to existing models.      | 1-2  |
|                              | 3b  | D;V            | Specify the objectives, including whether the study describes the development or validation of the model or both.                                                                                     | 1-2  |
| Methods                      |     |                |                                                                                                                                                                                                       |      |
| Source of data               | 4a  | D;V            | Describe the study design or source of data (e.g., randomized trial, cohort, or registry data), separately for the development and validation data sets, if applicable.                               | 2-3  |
|                              | 4b  | D;V            | Specify the key study dates, including start of accrual; end of accrual; and, if applicable, end of follow-up.                                                                                        | 2-3  |
| Participants                 | 5a  | D;V            | Specify key elements of the study setting (e.g., primary care, secondary care, general population) including number and location of centres.                                                          | 2-3  |
|                              | 5b  | D;V            | Describe eligibility criteria for participants.                                                                                                                                                       | 2-3  |
|                              | 5c  | D;V            | Give details of treatments received, if relevant.                                                                                                                                                     | 2-3  |
| Outcome                      | 6a  | D;V            | Clearly define the outcome that is predicted by the prediction model, including how and when assessed.                                                                                                | 2-3  |
|                              | 6b  | D;V            | Report any actions to blind assessment of the outcome to be predicted.                                                                                                                                | 2-3  |
| Predictors                   | 7a  | D;V            | Clearly define all predictors used in developing or validating the multivariable prediction model, including how and when they were measured.                                                         | 2-3  |
|                              | 7b  | D;V            | Report any actions to blind assessment of predictors for the outcome and other predictors.                                                                                                            | 2-3  |
| Sample size                  | 8   | D;V            | Explain how the study size was arrived at.                                                                                                                                                            | 2-3  |
| Missing data                 | 9   | D;V            | Describe how missing data were handled (e.g., complete-case analysis, single imputation, multiple imputation) with details of any imputation method.                                                  | 2    |
| Statistical analysis methods | 10a | D              | Describe how predictors were handled in the analyses.                                                                                                                                                 | 3    |
|                              | 10b | D              | Specify type of model, all model-building procedures (including any predictor selection), and method for internal validation.                                                                         | 3    |
|                              | 10c | V              | For validation, describe how the predictions were calculated.                                                                                                                                         | 3    |
|                              | 10d | D;V            | Specify all measures used to assess model performance and, if relevant, to compare multiple models.                                                                                                   | 3    |
|                              | 10e | V              | Describe any model updating (e.g., recalibration) arising from the validation, if done.                                                                                                               | -    |
| Risk groups                  | 11  | D;V            | Provide details on how risk groups were created, if done.                                                                                                                                             | 3    |
| Development vs. validation   | 12  | V              | For validation, identify any differences from the development data in setting, eligibility criteria, outcome, and predictors.                                                                         | 4    |
| Results                      |     |                |                                                                                                                                                                                                       |      |
| Participants                 | 13a | D;V            | Describe the flow of participants through the study, including the number of participants with and without the outcome and, if applicable, a summary of the follow-up time. A diagram may be helpful. | 3    |
|                              | 13b | D;V            | Describe the characteristics of the participants (basic demographics, clinical features, available predictors), including the number of participants with missing data for predictors and outcome.    | 4    |
|                              | 13c | V              | For validation, show a comparison with the development data of the distribution of important variables (demographics, predictors and outcome).                                                        | -    |
| Model development            | 14a | D              | Specify the number of participants and outcome events in each analysis.                                                                                                                               | 3    |
|                              | 14b | D              | If done, report the unadjusted association between each candidate predictor and outcome.                                                                                                              | 5-6  |
| Model specification          | 15a | D              | Present the full prediction model to allow predictions for individuals (i.e., all regression coefficients, and model intercept or baseline survival at a given time point).                           | 6    |
|                              | 15b | D              | Explain how to use the prediction model.                                                                                                                                                              | 6-7  |
| Model                        | 16  | D;V            | Report performance measures (with CIs) for the prediction model.                                                                                                                                      | 6-7  |

|                           |     |     |                                                                                                                                                |     |
|---------------------------|-----|-----|------------------------------------------------------------------------------------------------------------------------------------------------|-----|
| performance               |     |     |                                                                                                                                                |     |
| Model-updating            | 17  | V   | If done, report the results from any model updating (i.e., model specification, model performance).                                            | 6-7 |
| <b>Discussion</b>         |     |     |                                                                                                                                                |     |
| Limitations               | 18  | D;V | Discuss any limitations of the study (such as nonrepresentative sample, few events per predictor, missing data).                               | 8   |
| Interpretation            | 19a | V   | For validation, discuss the results with reference to performance in the development data, and any other validation data.                      | 7-8 |
|                           | 19b | D;V | Give an overall interpretation of the results, considering objectives, limitations, results from similar studies, and other relevant evidence. | 7-8 |
| Implications              | 20  | D;V | Discuss the potential clinical use of the model and implications for future research.                                                          | 8   |
| <b>Other information</b>  |     |     |                                                                                                                                                |     |
| Supplementary information | 21  | D;V | Provide information about the availability of supplementary resources, such as study protocol, Web calculator, and data sets.                  | 9   |
| Funding                   | 22  | D;V | Give the source of funding and the role of the funders for the present study.                                                                  | 9   |

**Supplementary Table S2. Descriptive characteristics of the participants by sex**

| Characteristic                     | Male<br>(n=3128) | Female<br>(n=3909) | P value |
|------------------------------------|------------------|--------------------|---------|
| Age, years                         | 58.4 (11.2)      | 58.3 (11.2)        | 0.853   |
| Height, cm                         | 169.0 (6.1)      | 156.3 (6.0)        | <0.001  |
| Weight, kg                         | 70.0 (10.0)      | 58.5 (8.9)         | <0.001  |
| Body mass index, kg/m <sup>2</sup> | 24.5 (2.9)       | 24.0 (3.4)         | <0.001  |
| Waist circumference, cm            | 87.0 (8.1)       | 80.4 (9.0)         | <0.001  |
| Systolic blood pressure, mmHg      | 122.4 (15.1)     | 120.3 (17.8)       | <0.001  |
| Diastolic blood pressure, mmHg     | 78.0 (10.4)      | 74.8 (9.7)         | <0.001  |
| Fasting serum glucose, mg/dL       | 108.2 (27.6)     | 100.6 (21.0)       | <0.001  |
| Total cholesterol, mg/dL           | 191.3 (39.1)     | 198.3 (38.7)       | <0.001  |
| Triglyceride, mg/dL                | 165.9 (130.6)    | 121.5 (76.6)       | <0.001  |
| Aspartate aminotransferase, IU/L   | 25.8 (12.3)      | 22.6 (10.6)        | <0.001  |
| Alanine aminotransferase, IU/L     | 26.6 (16.7)      | 19.5 (12.4)        | <0.001  |
| Blood urea nitrogen, mg/dL         | 16.1 (4.5)       | 15.2 (4.6)         | <0.001  |
| Creatinine, mg/dL                  | 1.0 (0.2)        | 0.7 (0.2)          | <0.001  |
| Urinary protein                    |                  |                    |         |
| Negative*                          | 2552 (81.6)      | 3513 (89.9)        | 0.239   |
| Positive**                         | 576 (18.4)       | 396 (10.1)         |         |
| Urinary glucose                    |                  |                    |         |
| Negative*                          | 2860 (91.4)      | 3811 (97.5)        | 0.267   |
| Positive**                         | 268 (8.6)        | 98 (2.5)           |         |
| Urinary pH                         | 5.8 (0.8)        | 5.9 (0.8)          | <0.001  |
| COPD, n (%)                        |                  |                    |         |
| No                                 | 2441 (78.0)      | 3647 (93.3)        | <0.001  |
| Yes                                | 687 (22.0)       | 262 (6.7)          |         |
| Alcohol consumption, n (%)         |                  |                    |         |
| No                                 | 1140 (36.4)      | 2872 (73.5)        | <0.001  |
| Yes                                | 1988 (63.6)      | 1037 (26.5)        |         |
| Smoking, n (%)                     |                  |                    |         |
| Never                              | 551 (17.6)       | 3580 (91.6)        | <0.001  |
| Past                               | 1552 (49.6)      | 170 (4.3)          |         |
| Current                            | 1025 (32.8)      | 159 (4.1)          |         |
| Physical activity, n (%)           |                  |                    |         |
| No                                 | 1882 (60.2)      | 2465 (63.1)        | 0.014   |
| Yes                                | 1246 (39.8)      | 1444 (36.9)        |         |

Data are mean (standard deviation) unless indicated otherwise.

P values calculated using t test (continuous variable) and chi-square test (categorical variable).

Acronyms: COPD, chronic obstructive pulmonary disease.

\*negative

\*\*positive (±, +, ++, +++, +++++)

**Supplementary Table S3. Univariable analyses of variables involved in the health examination for COPD in male participants**

| <b>Variable</b>                    | <b>Estimate</b> | <b>OR (95% CI)</b>  | <b>P value</b> | <b>C-index</b> |
|------------------------------------|-----------------|---------------------|----------------|----------------|
| Age, years                         | 0.090           | 1.090 (1.080-1.100) | <0.001         | 0.760          |
| Height, cm                         | -0.041          | 0.960 (0.950-0.970) | <0.001         | 0.573          |
| Weight, kg                         | -0.046          | 0.960 (0.950-0.960) | <0.001         | 0.623          |
| Body mass index, kg/m <sup>2</sup> | -0.134          | 0.870 (0.850-0.900) | <0.001         | 0.606          |
| Waist circumference, cm            | -0.017          | 0.980 (0.970-0.990) | 0.002          | 0.540          |
| Alcohol consumption, yes (vs. no)  | -0.313          | 0.760 (0.620-0.870) | <0.001         | 0.537          |
| Smoking                            |                 |                     | <0.001         | 0.548          |
| Past vs. Never                     | 0.550           | 1.730 (1.330-2.260) | <0.001         |                |
| Current vs. Never                  | 0.663           | 1.940 (1.470-2.560) | <0.001         |                |
| Physical activity, yes (vs. no)    | -0.147          | 0.860 (0.730-1.030) | 0.099          | 0.517          |
| <b>Blood pressure</b>              |                 |                     |                |                |
| Systolic blood pressure, mmHg      | 0.005           | 1.005 (0.999-1.011) | 0.079          | 0.528          |
| Diastolic blood pressure, mmHg     | -0.057          | 0.950 (0.940-0.950) | <0.001         | 0.654          |
| <b>Diabetes mellitus test</b>      |                 |                     |                |                |
| Fasting serum glucose, mg/dL       | -0.001          | 0.999 (0.995-1.002) | 0.350          | 0.503          |
| <b>Dyslipidemia test</b>           |                 |                     |                |                |
| Total cholesterol, mg/dL           | -0.007          | 0.993 (0.990-0.995) | <0.001         | 0.583          |
| Triglyceride, mg/dL                | -0.002          | 0.998 (0.997-0.999) | <0.001         | 0.568          |
| <b>Liver function test</b>         |                 |                     |                |                |
| Aspartate aminotransferase, IU/L   | -0.008          | 0.992 (0.984-1.000) | 0.048          | 0.512          |
| Alanine aminotransferase, IU/L     | -0.026          | 0.970 (0.970-0.980) | <0.001         | 0.602          |
| <b>Kidney function test</b>        |                 |                     |                |                |
| Blood urea nitrogen, mg/dl         | 0.036           | 1.040 (1.020-1.060) | <0.001         | 0.543          |
| Creatinine, mg/dl                  | 0.072           | 1.070 (0.700-1.640) | 0.740          | 0.496          |
| <b>Urine test</b>                  |                 |                     |                |                |
| Urinary protein                    | -0.015          | 0.990 (0.850-1.140) | 0.841          | 0.501          |
| Urinary glucose                    | -0.091          | 0.910 (0.820-1.010) | 0.076          | 0.506          |
| Urinary pH                         | 0.039           | 1.040 (0.940-1.160) | 0.466          | 0.504          |

OR calculated using logistic regression.

Acronyms: OR, odds ratio; CI, confidence interval.

**Supplementary Table S4. Univariable analyses of variables involved in the health examination for COPD in female participants**

| Variable                           | Estimate | OR (95% CI)         | P value | C-index |
|------------------------------------|----------|---------------------|---------|---------|
| Age, years                         | 0.081    | 1.080 (1.070-1.100) | <0.001  | 0.742   |
| Height, cm                         | -0.051   | 0.950 (0.930-0.970) | <0.001  | 0.582   |
| Weight, kg                         | -0.032   | 0.970 (0.950-0.980) | <0.001  | 0.563   |
| Body mass index, kg/m <sup>2</sup> | -0.034   | 0.970 (0.930-1.000) | 0.077   | 0.521   |
| Waist circumference, cm            | 0.009    | 1.009 (0.995-1.023) | 0.207   | 0.532   |
| Alcohol consumption, yes (vs. no)  | -0.352   | 0.700 (0.520-0.960) | 0.021   | 0.532   |
| Smoking                            |          |                     | 0.093   | 0.520   |
| Past vs. Never                     | 0.414    | 1.510 (0.890-2.580) | 0.127   |         |
| Current vs. Never                  | 0.488    | 1.630 (0.960-2.780) | 0.073   |         |
| Physical activity, yes (vs. no)    | -0.346   | 0.710 (0.540-0.930) | 0.012   | 0.538   |
| <b>Blood pressure</b>              |          |                     |         |         |
| Systolic blood pressure, mmHg      | 0.014    | 1.010 (1.010-1.020) | <0.001  | 0.581   |
| Diastolic blood pressure, mmHg     | -0.028   | 0.970 (0.960-0.990) | <0.001  | 0.570   |
| <b>Diabetes mellitus test</b>      |          |                     |         |         |
| Fasting serum glucose, mg/dL       | 0.005    | 1.005 (1.000-1.010) | 0.086   | 0.531   |
| <b>Dyslipidemia test</b>           |          |                     |         |         |
| Total cholesterol, mg/dL           | -0.003   | 0.997 (0.994-1.000) | 0.068   | 0.532   |
| Triglyceride, mg/dL                | 0.001    | 1.001 (1.000-1.003) | 0.071   | 0.563   |
| <b>Liver function test</b>         |          |                     |         |         |
| Aspartate aminotransferase, IU/L   | 0.004    | 1.004 (0.994-1.013) | 0.459   | 0.543   |
| Alanine aminotransferase, IU/L     | -0.008   | 0.992 (0.980-1.003) | 0.143   | 0.516   |
| <b>Kidney function test</b>        |          |                     |         |         |
| Blood urea nitrogen, mg/dl         | 0.057    | 1.060 (1.030-1.080) | <0.001  | 0.591   |
| Creatinine, mg/dl                  | 0.721    | 2.060 (1.240-3.400) | 0.002   | 0.540   |
| <b>Urine test</b>                  |          |                     |         |         |
| Urinary protein (vs. Negative)     | 0.234    | 1.260 (1.000-1.600) | 0.070   | 0.532   |
| Urinary glucose (vs. Negative)     | 0.040    | 1.040 (0.840-1.290) | 0.723   | 0.520   |
| Urinary pH                         | 0.135    | 1.140 (0.990-1.320) | 0.069   | 0.538   |

OR calculated using logistic regression.

Acronyms: OR, odds ratio; CI, confidence interval.

**Supplementary Table S5. Multivariable model for prediction of COPD when further added smoking as a component**

| <b>Covariate</b>               | <b>Estimate</b> | <b>OR (95% CI)</b>  | <b>P value</b> |
|--------------------------------|-----------------|---------------------|----------------|
| Intercept                      | -5.075          |                     | <0.001         |
| Age, years                     | 0.094           | 1.098 (1.089-1.107) | <0.001         |
| Sex, female                    | -1.032          | 0.356 (0.279-0.454) | <0.001         |
| Waist circumference, cm        | -0.019          | 0.982 (0.972-0.991) | <0.001         |
| Diastolic blood pressure, mmHg | -0.014          | 0.986 (0.978-0.995) | 0.001          |
| Smoking, past (vs. never)      | 0.558           | 1.743 (1.360-2.239) | <0.001         |
| Smoking, current (vs. never)   | 1.318           | 3.738 (2.872-4.873) | <0.001         |

OR calculated using logistic regression.

Acronyms: OR, odds ratio; CI, confidence interval.

**Supplementary Table S6. Multivariable model for prediction of COPD in male participants**

| <b>Covariate</b>                   | <b>Estimate</b> | <b>OR (95% CI)</b>  | <b>P value</b> |
|------------------------------------|-----------------|---------------------|----------------|
| Intercept                          | -2.246          |                     | 0.003          |
| Age, years                         | 0.085           | 1.080 (1.070-1.095) | <0.001         |
| Body mass index, kg/m <sup>2</sup> | -0.085          | 0.919 (0.886-0.952) | <0.001         |
| Diastolic blood pressure, mmHg     | -0.016          | 0.984 (0.974-0.994) | 0.002          |
| Total cholesterol, mg/dL           | -0.001          | 0.999 (0.996-1.001) | 0.317          |
| Triglyceride, mg/dL                | 0.000           | 1.000 (1.000-1.001) | 0.260          |
| Alanine aminotransferase, IU/L     | -0.007          | 0.992 (0.985-1.000) | 0.052          |
| Blood urea nitrogen, mg/dl         | -0.019          | 0.980 (0.960-1.001) | 0.064          |

OR calculated using logistic regression.

Acronyms: OR, odds ratio; CI, confidence interval.

**Supplementary Table S7. Multivariable model for prediction of COPD in female participants**

| <b>Covariate</b>              | <b>Estimate</b> | <b>OR (95% CI)</b>  | <b>P value</b> |
|-------------------------------|-----------------|---------------------|----------------|
| Intercept                     | -14.298         |                     | <0.001         |
| Age, years                    | 0.094           | 1.100 (1.080-1.120) | <0.001         |
| Height, cm                    | 0.051           | 1.050 (1.020-1.080) | <0.001         |
| Weight, kg                    | 0.033           | 0.970 (0.950-0.980) | <0.001         |
| Systolic blood pressure, mmHg | -0.003          | 0.997 (0.989-1.005) | 0.420          |
| Blood urea nitrogen, mg/dl    | 0.005           | 1.005 (0.978-1.032) | 0.718          |

OR calculated using logistic regression.

Acronyms: OR, odds ratio; CI, confidence interval.
